# Supplementary material for: Autochthonous faecal viral transfer (FVT) impacts the murine microbiome after antibiotic perturbation
Source: PubMed Central journal article supplement (PMC7679995; doi:10.1186/s12915-020-00906-0), 2020-11-20

**A**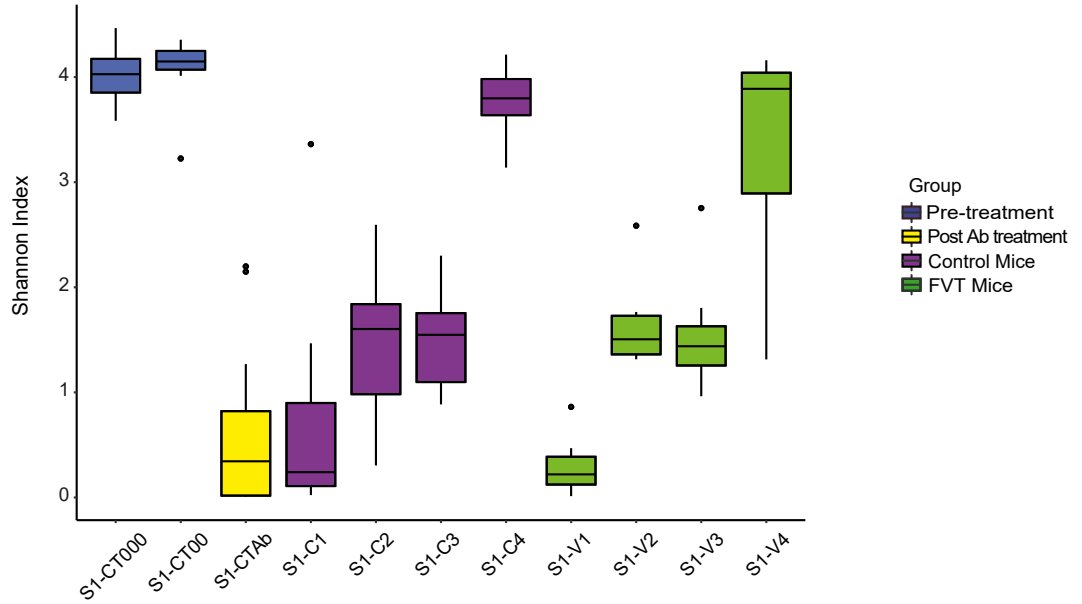**B**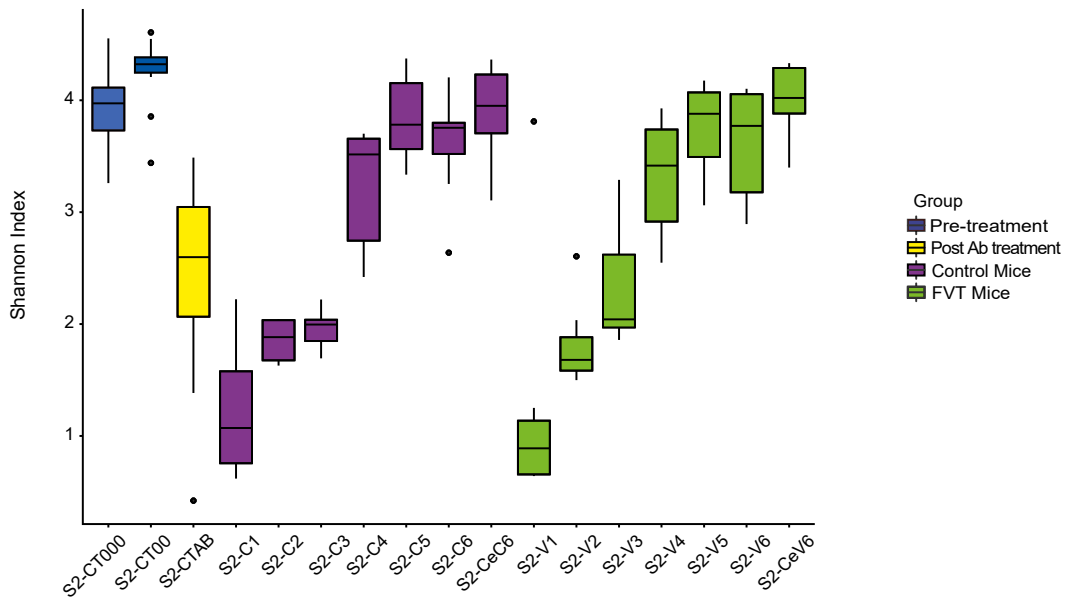

Supplement: 12915_2020_906_MOESM4_ESM.pdf [file 12915_2020_906_MOESM4_ESM.pdf]
